# Supplementary material for: The functional interactome of PYHIN immune regulators reveals IFIX is a sensor of viral DNA
Source: PubMed Central journal article supplement (PMC4358659; doi:10.15252/msb.20145808), 2015-02-09
Supplement: msb0011-0787-sd1.pdf [file msb0011-0787-sd1.pdf]

## Supplementary Information Table of Contents

“The functional interactome of PYHIN immune regulators reveals IFIX is a sensor of viral DNA”

|                          | <b>Description</b>                                                        | <b>Pg</b> |
|--------------------------|---------------------------------------------------------------------------|-----------|
| Supplementary Figure S1  | Investigating the PYHIN proteins in HEK293 cells                          | 2         |
| Supplementary Figure S2  | Validating cell-based tools for probing the PYHIN family interactome      | 3         |
| Supplementary Figure S3  | Efficiency of isolations for GFP-tagged AIM2 and MNDA                     | 4         |
| Supplementary Figure S4  | Distribution of SAINT scores                                              | 5         |
| Supplementary Figure S5  | IFI16 interactome as a function of enrichment index                       | 6         |
| Supplementary Figure S6  | IFIX interactome as a function of enrichment index                        | 7         |
| Supplementary Figure S7  | MNDA interactome as a function of enrichment index                        | 8         |
| Supplementary Figure S8  | AIM2 interactome as a function of enrichment index                        | 9         |
| Supplementary Figure S9  | Stability of PYHIN family interactions                                    | 10        |
| Supplementary Figure S10 | Co-localization of IFIX-GFP and IFI16-GFP with VACV in the cytoplasm      | 11        |
| Supplementary Figure S11 | Localization of IFIX-GFP during HSV-1 infection                           | 12        |
| Supplementary Figure S12 | Interactions of IFIX-GFP during HSV-1 infection                           | 13        |
| Legends                  | Supplementary Table Legends                                               | 14        |
| Supplementary Table S1   | Primers for N- or C-terminally GFP tagging of pyhin genes                 | 15        |
| Supplementary Table S2   | Primers for generating inducible HEK293 cell lines                        | 16        |
| Supplementary Table S3   | Primers used for Reverse Transcription-Quantitative PCR                   | 17        |
| Supplementary Table S4   | SAINT-filtered interactions observed in both N- and C-terminal isolations | NA        |
| Supplementary Table S5   | SAINT-filtered interactions unique to either N- or C-terminal isolations  | NA        |
| Supplementary Table S6   | Non-specific interactions excluded from the PYHIN family interactome      | NA        |
| Supplementary Table S7   | Nuclear IFI16 Interactions in Differentiated THP-1 Monocytes              | NA        |
| Supplementary Table S8   | IFI16 Interactions in Human Foreskin Fibroblasts                          | NA        |
| Supplementary Table S9   | Primers for generating GST-tagged IFIX $\alpha$ 1 truncations             | 18        |
| Supplementary Table S10  | Oligonucleotide sequences of VACV 70mer and ISD                           | 19        |
| Supplementary Table S11  | Primers used for detection of HSV-1 genomic DNA                           | 20        |
| Supplementary Table S12  | IFIX Interactions following HSV-1 infection                               | NA        |

**A**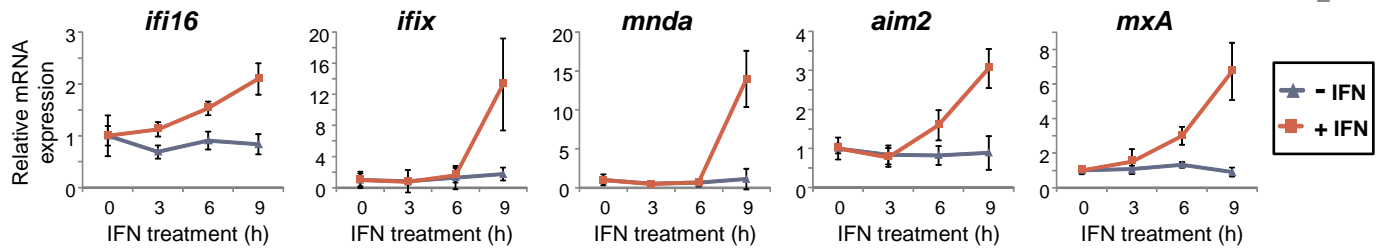**B**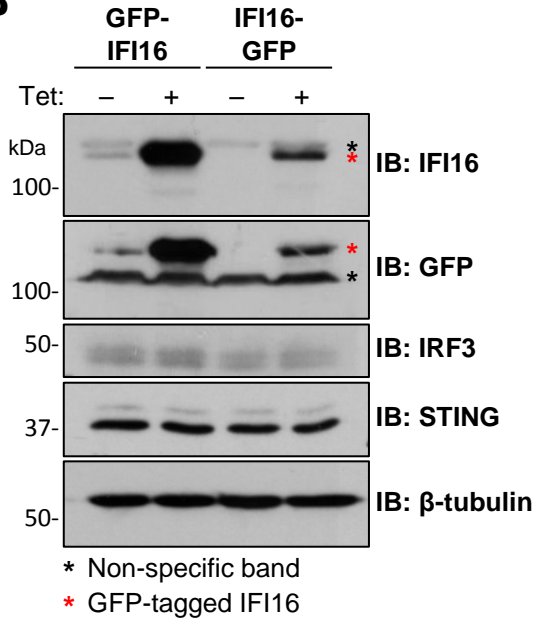

### Figure S1. Investigating the PYHIN proteins in HEK293 cells.

(A) RNA was collected from HEK293 cells treated with IFN- $\beta$  (1000U/mL) for the indicated amount of time. RT-qPCR analysis was performed to measure the induction of *pyhin* family genes. mRNA levels are normalized to cellular *gapdh* levels. The basal expression levels in wild type HEK293 cells for *ifi16*, *ifix*, *mnda*, *aim2*, and *mxA* relative to *gapdh* were 2.9E-6, 2.1E-5, 9.7E-5, 5.7E-7, and 2E-6, corresponding to raw Ct values of ~29, 20, 22, 30, and 28, respectively. Mean values  $\pm$  SD (n=3) are shown. (B) Lysates from uninduced or tetracycline-induced HEK293 cell lines with either GFP-IFI16 or IFI16-GFP transgenes were probed by Western blot for the presence of immune regulators STING and IRF3 using protein-specific antibodies.

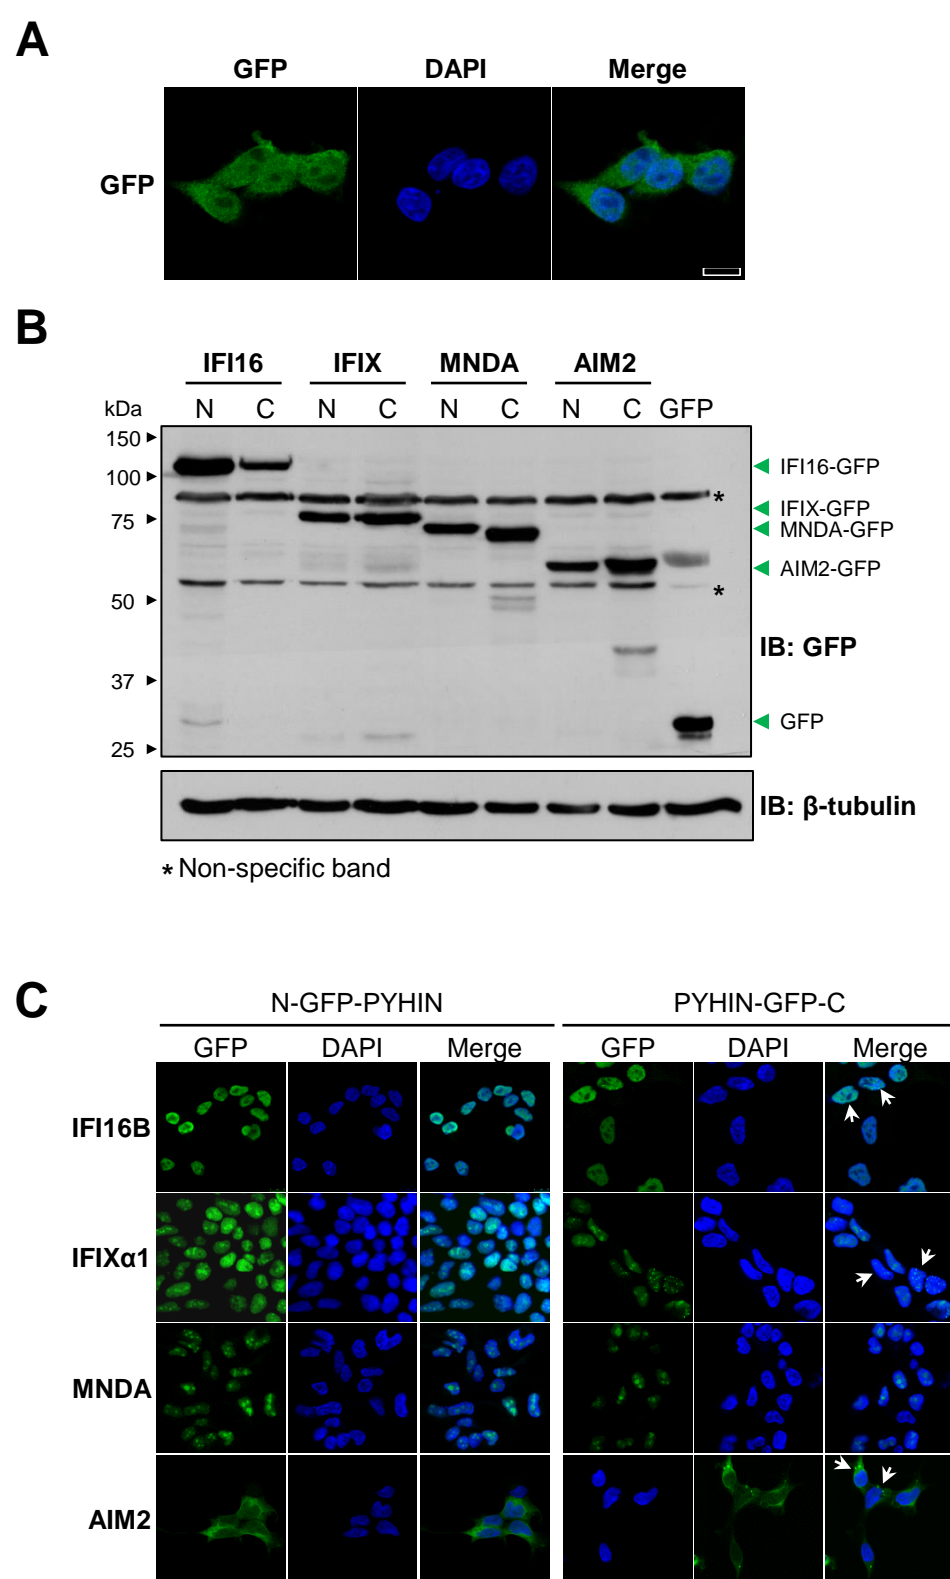

**Figure S2. Validating cell-based tools for probing the PYHIN family interactome.**

(A) Immunofluorescence confocal microscopy was used to image control HEK293 cell line inducibly expressing GFP only. Scale bar, 10  $\mu$ m. (B) Lysates from all 8 HEK293 cell lines induced to express N- or C-terminally GFP-tagged PYHIN transgenes were assessed Western blots. All GFP-tagged proteins were detected using GFP-specific antibody and are indicated by green arrows. (C) Immunofluorescence confocal microscopy was used to quantify the frequency of PYHIN punctate structures observed for the differentially tagged PYHIN proteins. Quantification of the distributions are provided in Figure 1. White arrows indicate examples of cells that were scored as possessing punctate PYHIN structures.

**A**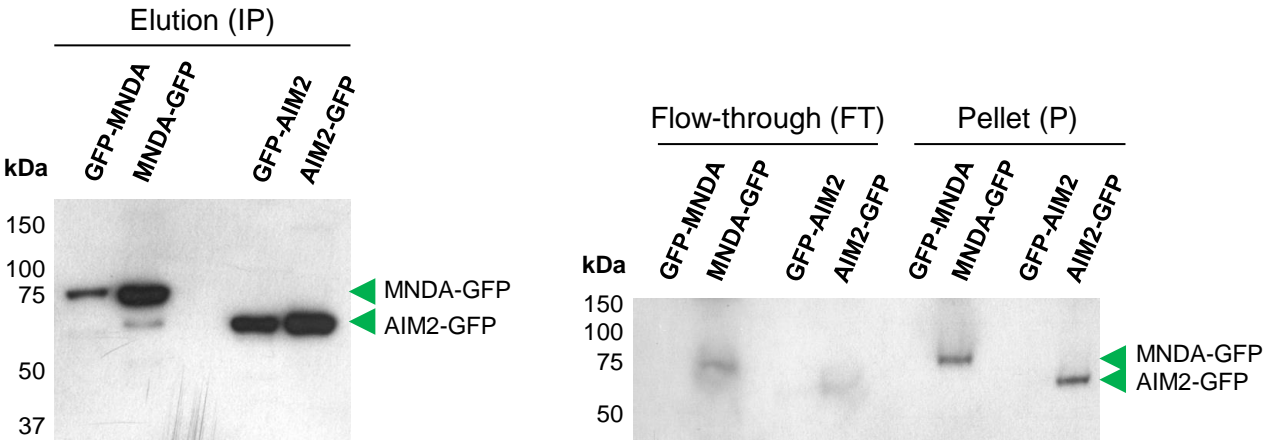**B**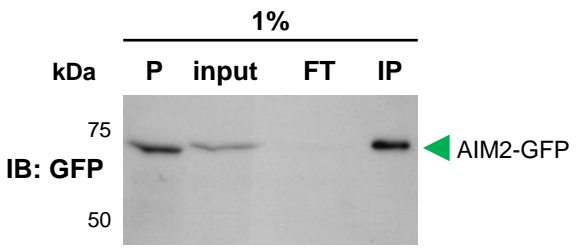

**Figure S3. Efficiency of isolations for GFP-tagged AIM2 and MNDA.**

(A) Original Western Blots (modified versions shown in Fig. 1F) from the samples ran for mass spectrometry for assessing isolation efficiency of N- and C-terminally GFP-tagged MNDA and AIM2. Equal proportions (1%) of the elution, flow-through and pellet fractions were loaded and the blots were exposed simultaneously (20 sec exposure). Green arrows indicate the GFP-tagged PYHIN proteins. (B) Additional example of Western blot demonstrating AIM2-GFP isolation efficiency.

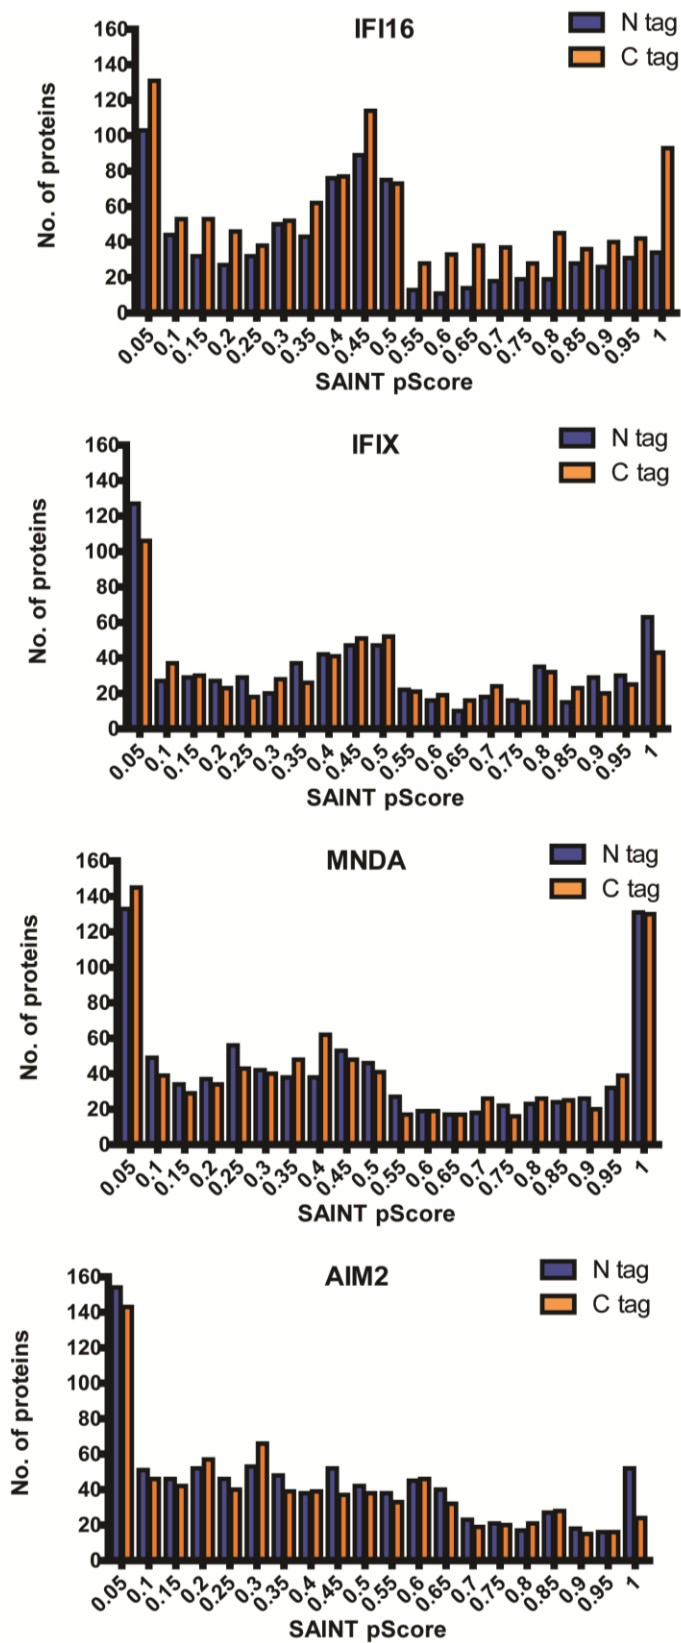

**Figure S4. Distribution of SAINT scores.**

The distribution of averaged SAINT scores (IF16, IFIX, MNDA n=2; AIM2 n=3) for all proteins co-isolated with N- (blue) or C- (orange) terminally GFP-tagged PYHIN proteins. Scores are binned in 0.05 increments.

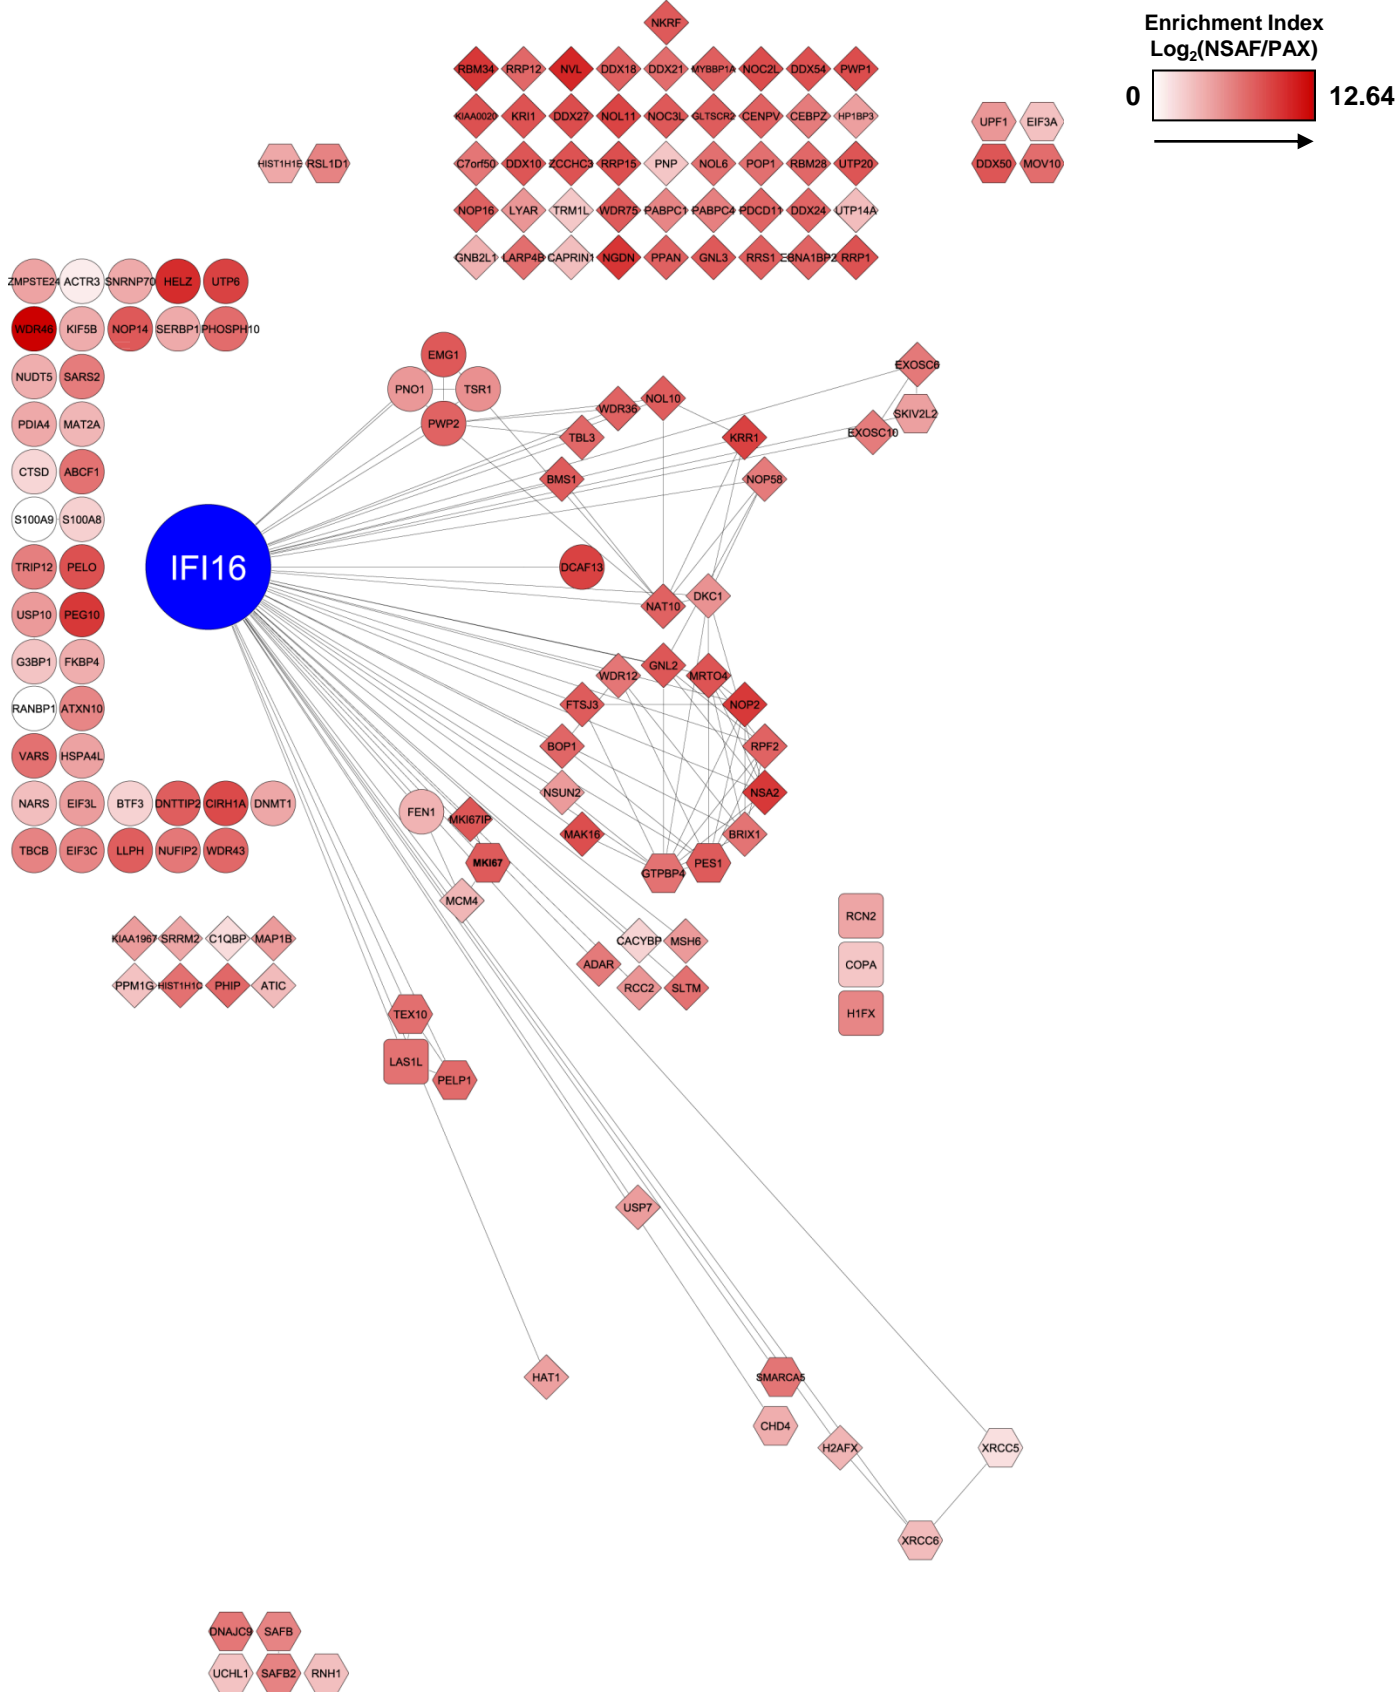

**Figure S5. IFI16 interactome as a function of enrichment index.** Interaction candidates of IFI16 with node color gradient representing increasing relative IP abundance versus whole cell (NSAF/PAX; see Materials and Methods). Positions and shapes of nodes are conserved from Figure 3.

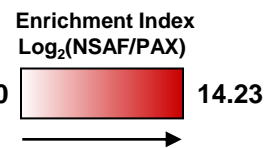

HIST1H1B RSL1D1

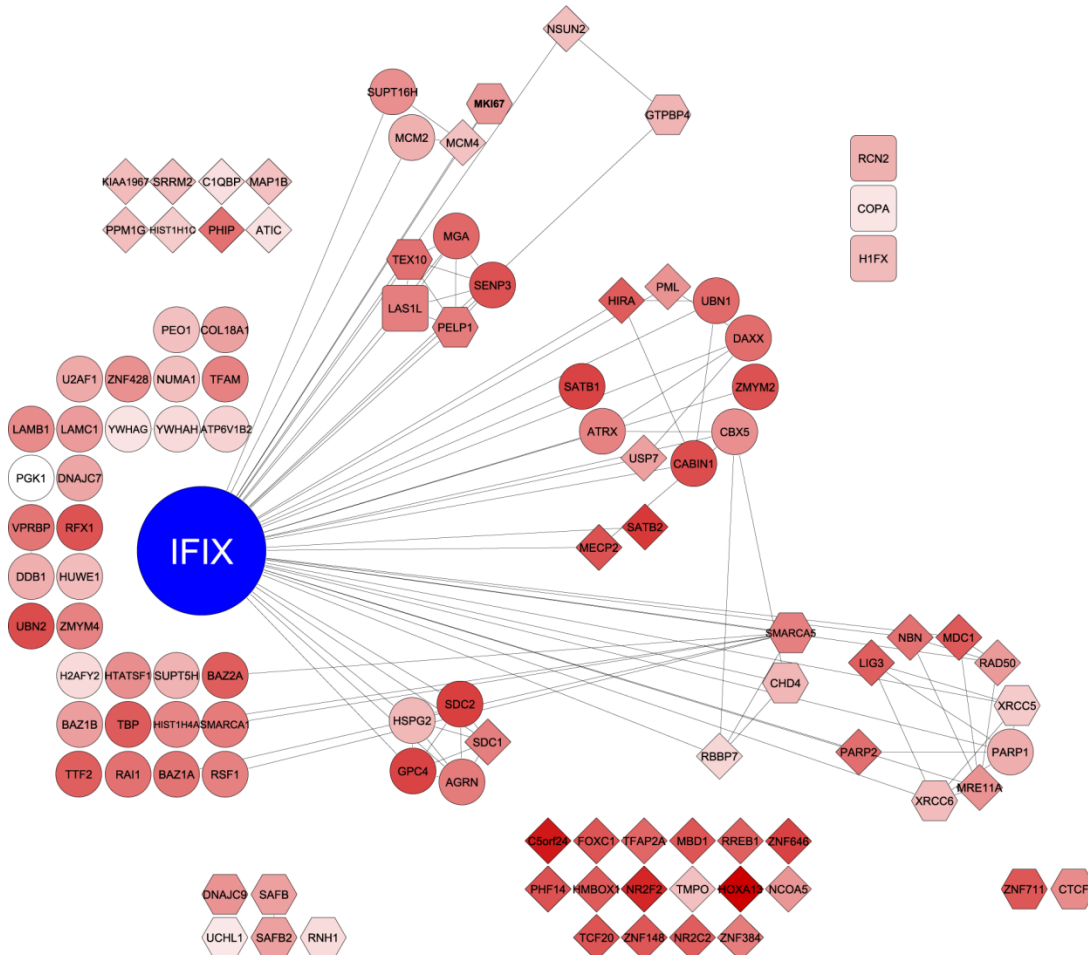

**Figure S6. IFIX interactome as a function of enrichment index.** Interaction candidates of IFIX with node color gradient representing increasing relative IP abundance versus whole cell (NSAF/PAX); see Materials and Methods). Positions and shapes of nodes are conserved from Figure 3.

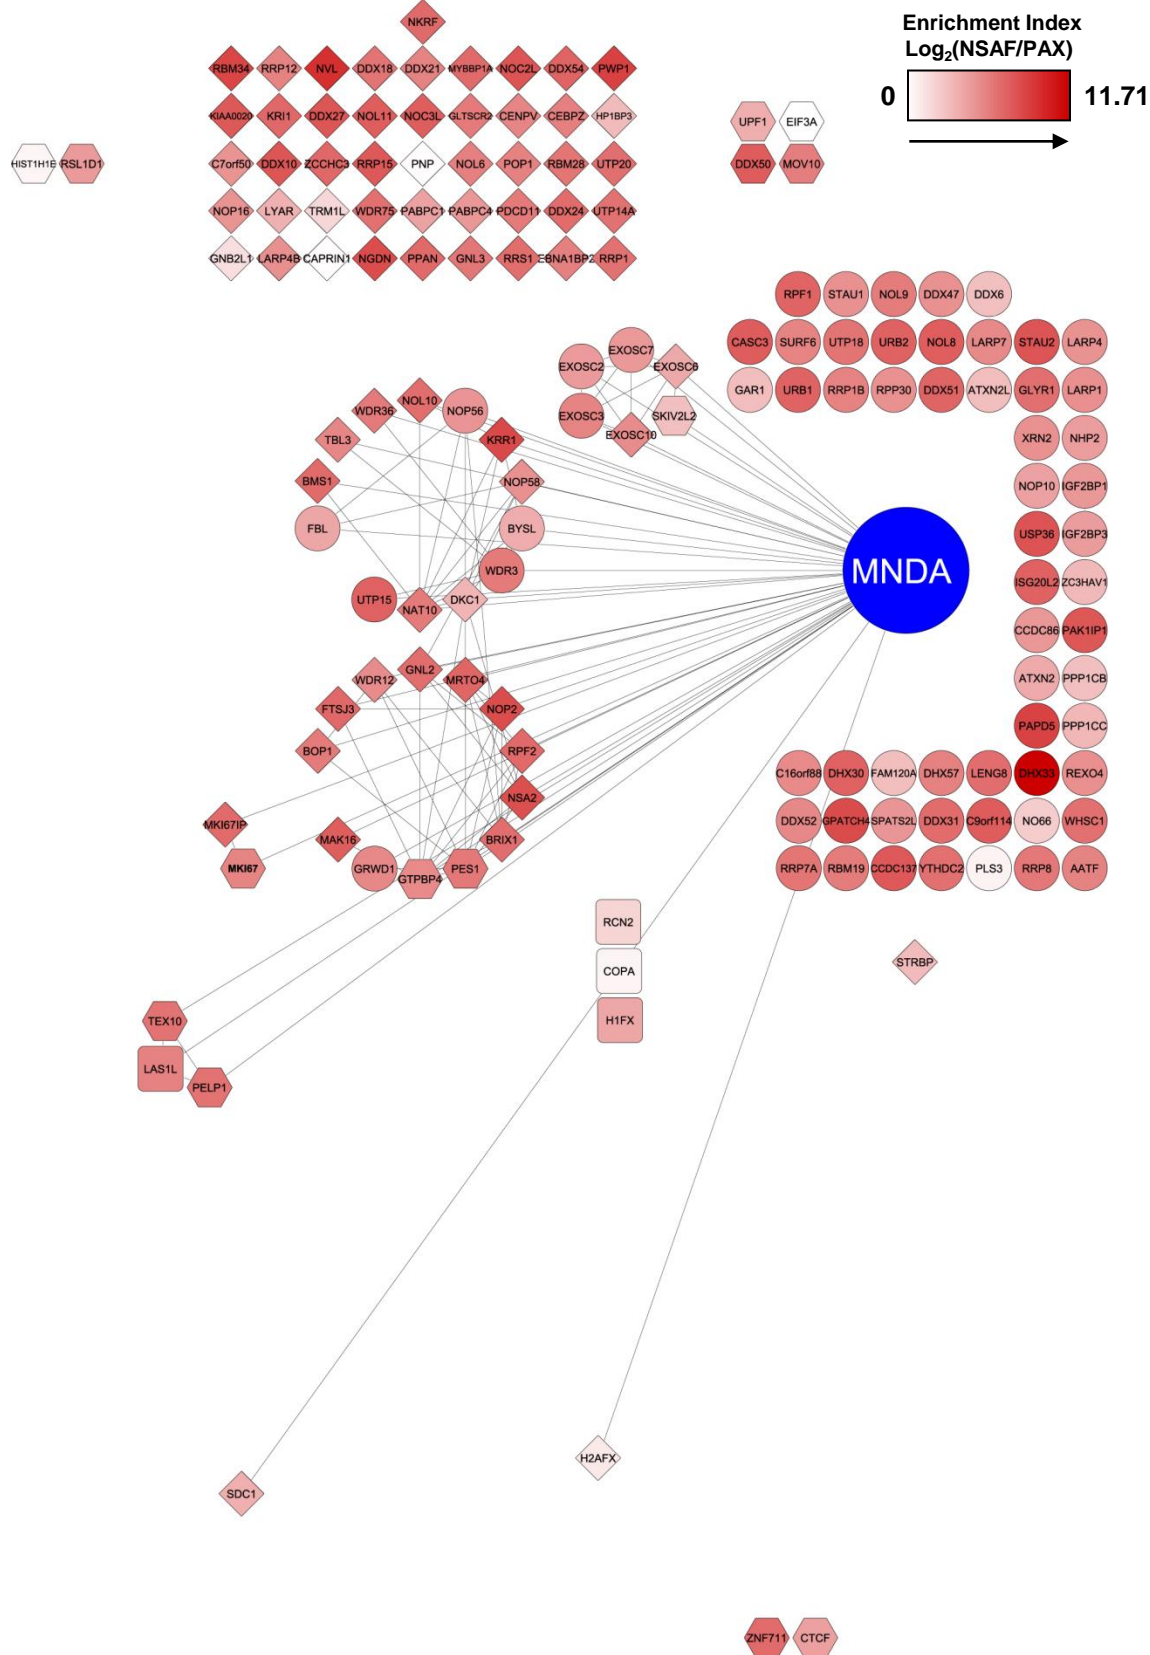

**Figure S7. MND A interactome as a function of enrichment index.** Interaction candidates of MND A with node color gradient representing increasing relative IP abundance versus whole cell (NSAF/PAX); see Materials and Methods). Positions and shapes of nodes are conserved from Figure 3.



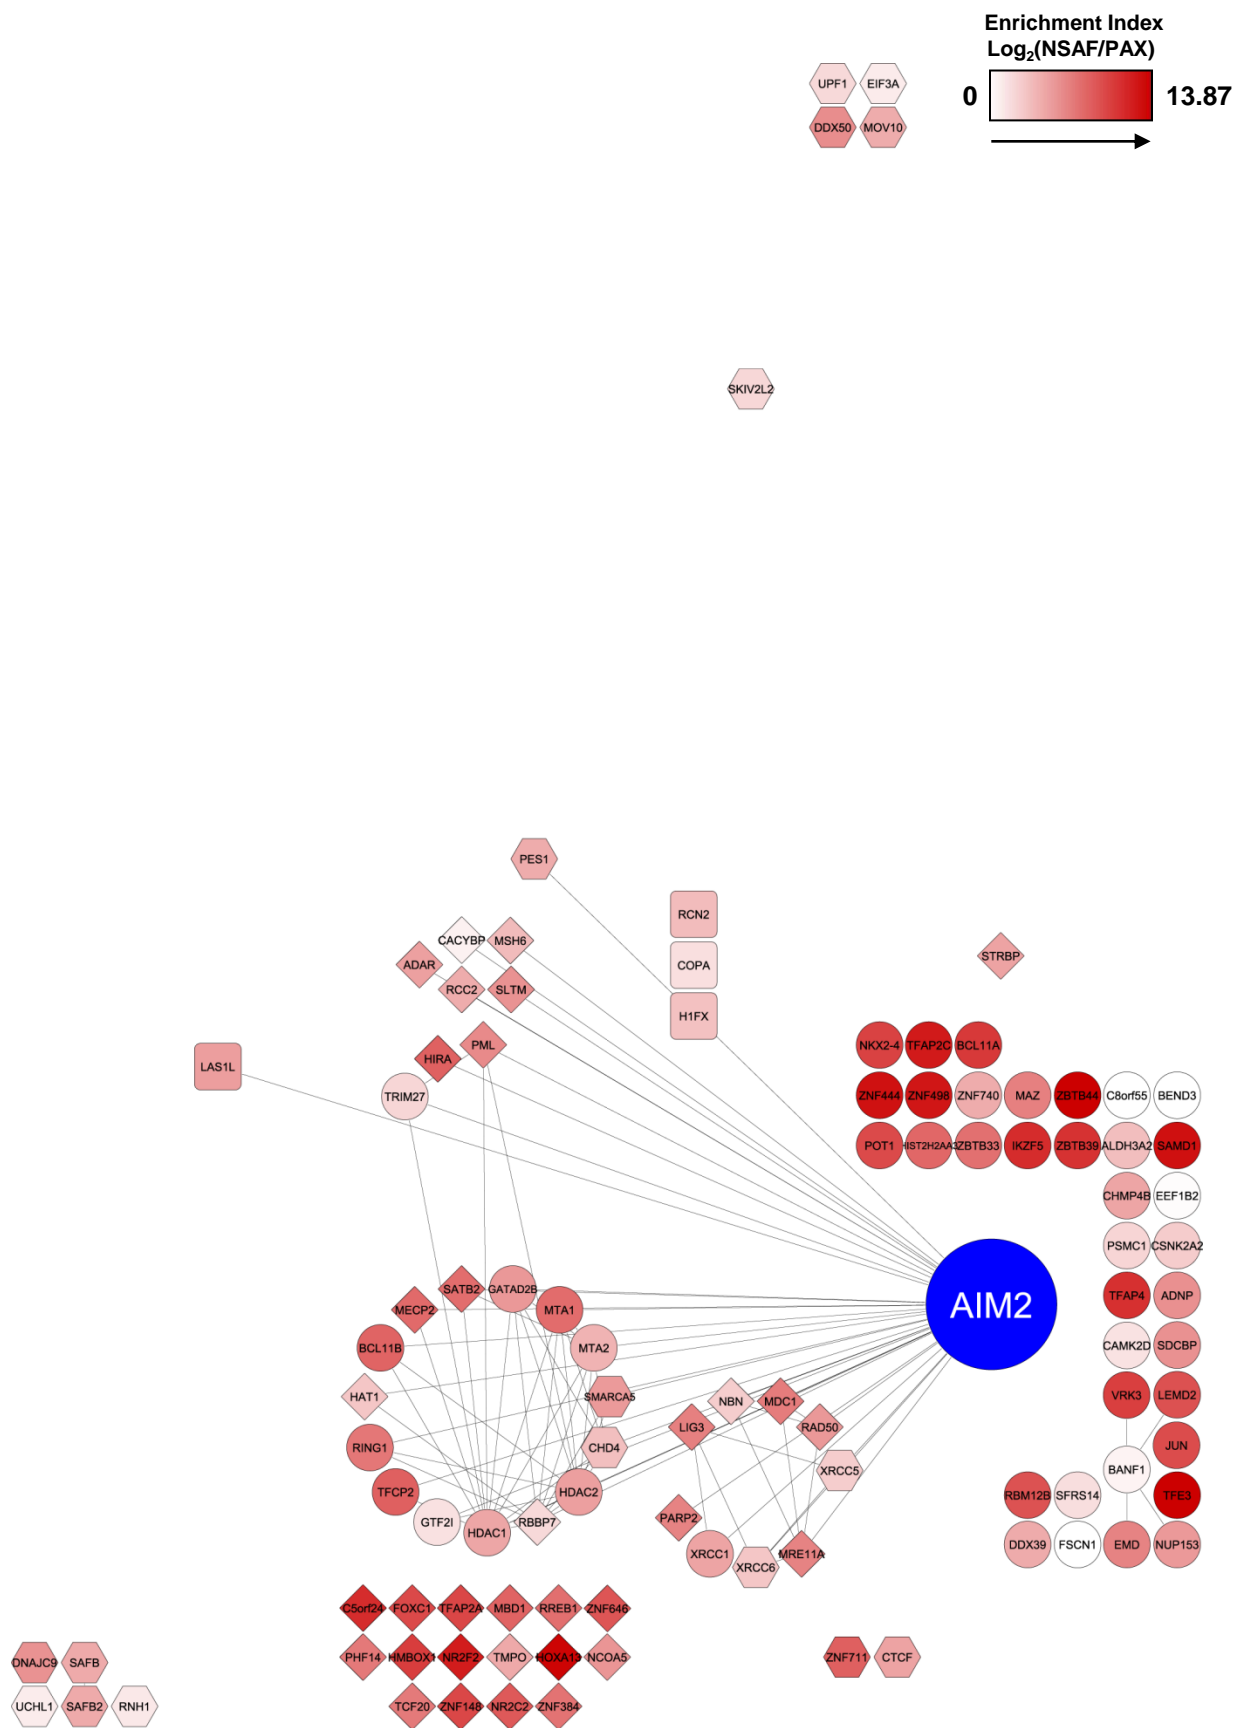

**Figure S8. AIM2 interactome as a function of enrichment index.** Interaction candidates of AIM2 with node color gradient representing increasing relative IP abundance versus whole cell (NSAF/PAX); see Materials and Methods). Positions and shapes of nodes are conserved from Figure 3.

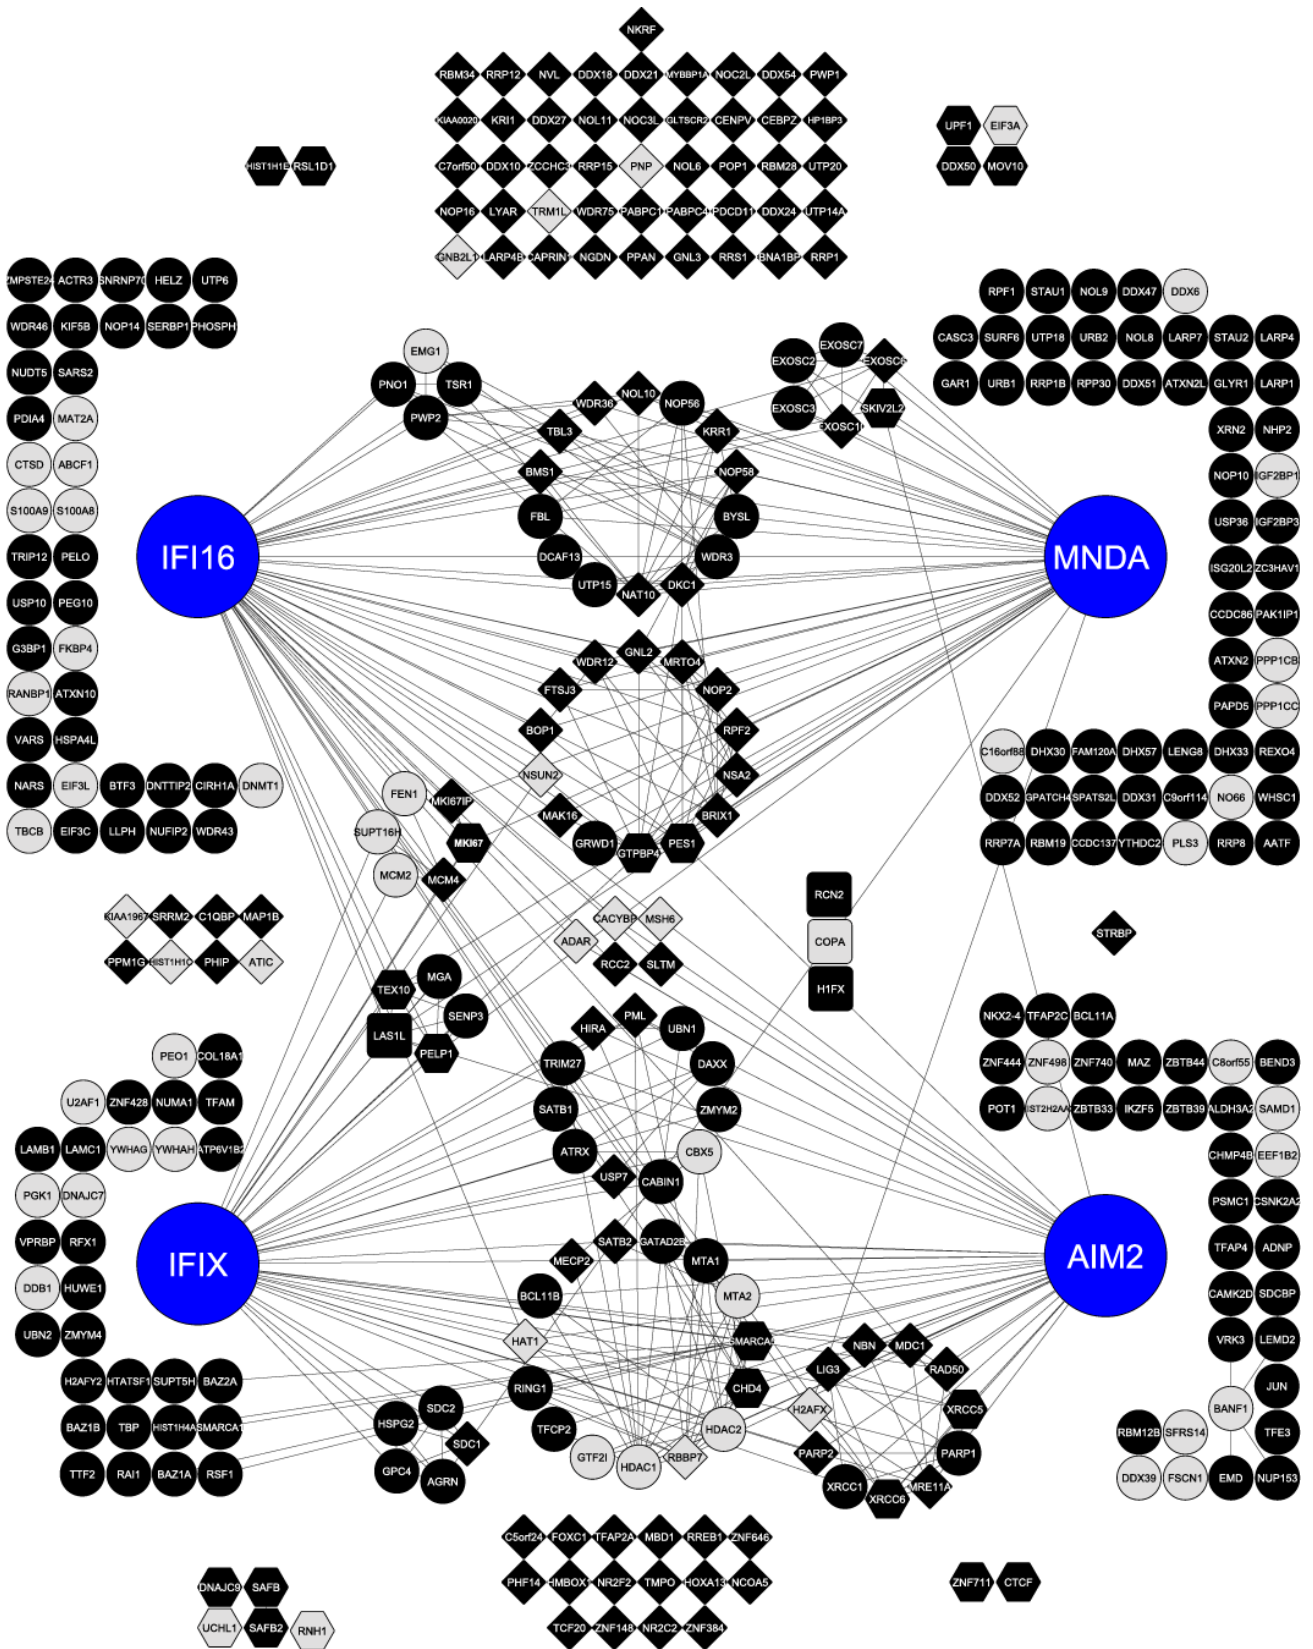

**Figure S9. Stability of PYHIN family interactions.** PYHIN protein interaction network from Fig 3 has been re-colored to indicate the 60 interactions (grey nodes) that no longer pass the SAINT scoring thresholds (see Materials and Methods) after including three additional controls from the Crapome server in the analysis. The Crapome database controls (CC173, CC175, and CC177) were selected to match the cell type (HEK293), affinity tag (GFP), support (magnetic beads), and instrument (Orbitrap Velos) of our current experimental design.

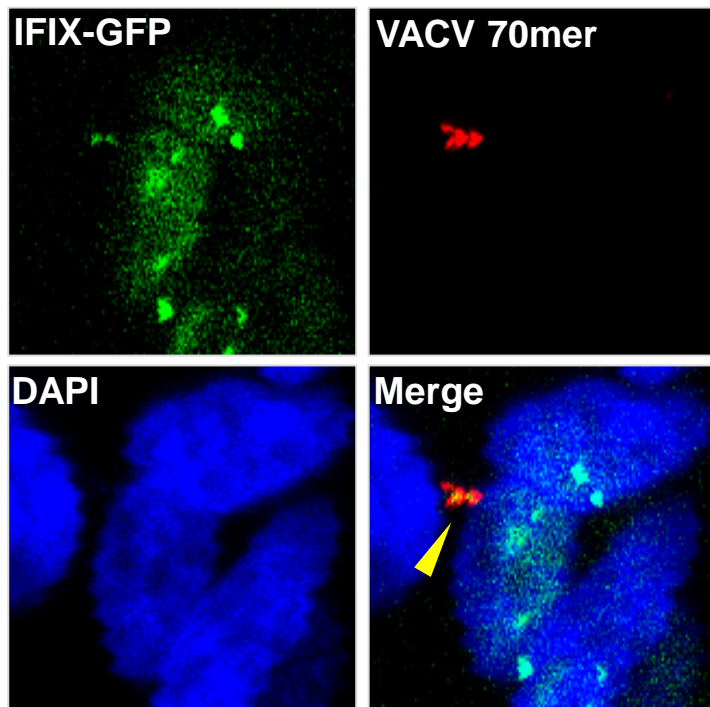

**B** Co-localization of IFI16-GFP with viral DNA in the cytoplasm

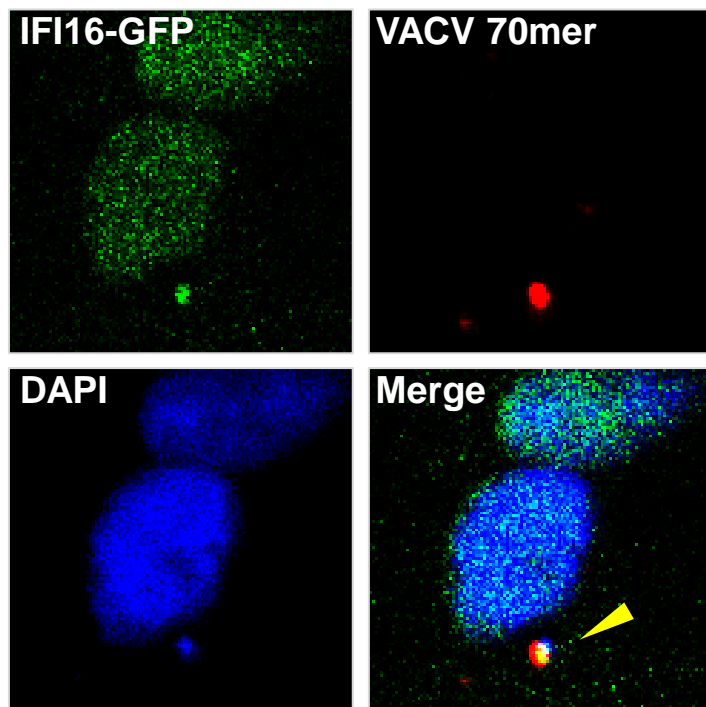

**Figure S10. Co-localization of IFIX-GFP and IFI16-GFP with VACV in the cytoplasm.** (A) Immunofluorescence confocal microscopy image (63x objective) showing co-localization of IFIX-GFP and transfected Cy3-VACV 70mer in HEK293 cells (yellow arrows). (B) Confocal microscopy image (63x objective) showing co-localization of IFI16-GFP with transfected Cy3-VACV 70mer in HEK293 cells (yellow arrows).

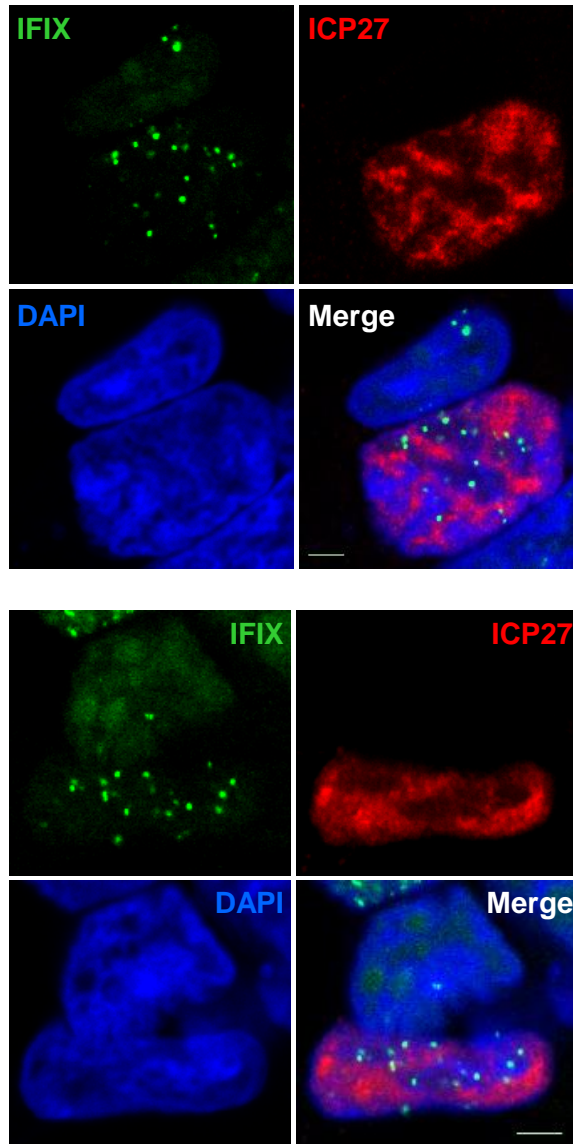

**Figure S11. Localization of IFIX-GFP during HSV-1 infection.** Immunofluorescence confocal microscopy images (63x objective) illustrating additional representative images of IFIX-GFP localization in HEK293 cells at 4 hours post infection with HSV-1 (MOI = 1). The viral protein ICP27 was used as a marker for infection and to facilitate the direct comparison of IFIX localization in uninfected and infected cells.

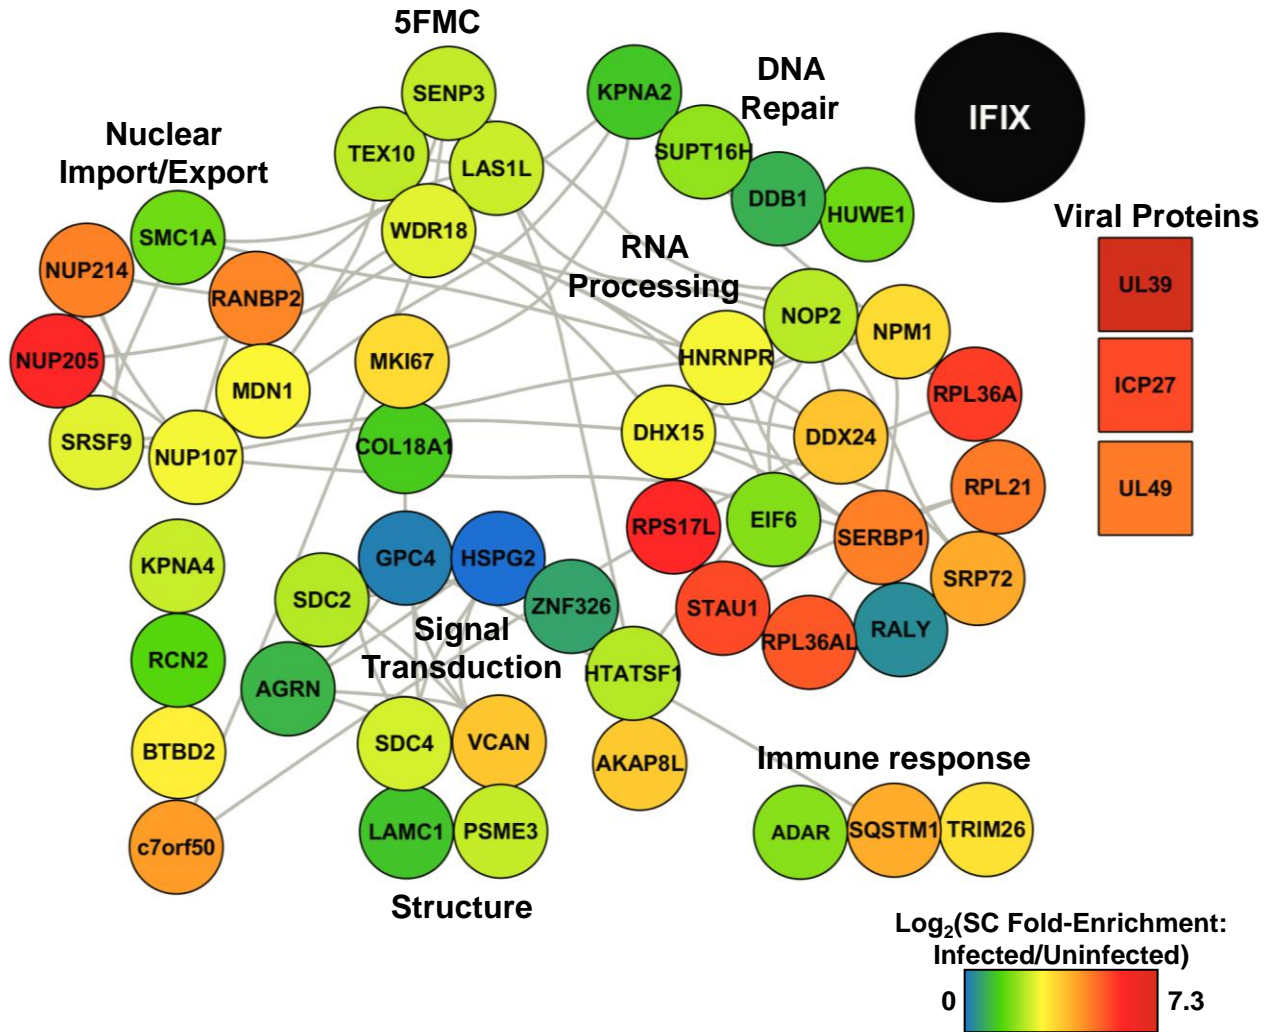

**Figure S12. Interactions of IFIX-GFP during HSV-1 infection.** IFIX-GFP was immunoaffinity purified (N=2) from HEK293 cells at 4 hours post infection with HSV-1 (MOI = 5), in parallel with control GFP (N=2). Protein interactions that passed SAINT filtering (>0.85) are illustrated. The Log<sub>2</sub> fold-enrichment of these interactions compared to those in uninfected cells is illustrated with colors. Edges represent physical interactions between nodes based on STRING analysis of the SAINT-filtered prey proteins.



**Supplementary Table S1. Primers for N- or C-terminally GFP tagging of *pyhin* genes.** Legend provided with the table below.

**Supplementary Table S2. Primers for generating inducible HEK293 cell lines.** Legend provided with the table below.

**Supplementary Table S3. Primers used for Reverse Transcription-Quantitative PCR.** Legend provided with the table below.

**Supplementary Table S4. SAINT-filtered Interactions Observed in Both N- and C-terminal Isolations.** Protein interaction candidates that were classified as specific after SAINT analysis in both N- and C-terminal isolations of IFIX, IFI16, MNDA, or AIM2. For each protein, the following information is provided: UniProt accession, gene symbol, protein length in amino acids, description, average SAINT score (Prob) and spectral counts (SC) for each PYHIN IP and GFP IP controls.

**Supplementary Table S5. SAINT-filtered Interactions Unique to Either N- or C-terminal Isolations.** Protein interaction candidates that were classified as specific after SAINT analysis for IFIX, IFI16, MNDA or AIM2 isolations, but were unique to either the N- and C-terminal isolations. This subset of proteins was excluded from the interactome network analysis. For each protein, the following information is provided: UniProt accession, gene symbol, protein length in amino acids, description, average SAINT score (Prob) and spectral counts (SC) for each PYHIN IP and GFP IP controls.

**Supplementary Table S6. Non-specific Interactions Excluded from the PYHIN Family Interactome.** Proteins that were classified as non-specific after SAINT analysis. For each protein, the following information is provided: UniProt accession, gene symbol, description, protein length in amino acids, average SAINT score (Prob) and spectral counts (SC) for each PYHIN IP and GFP IP controls.

**Supplementary Table S7. Nuclear IFI16 Interactions in Differentiated THP-1 Monocytes.** For each protein, the following information is provided: UniProt accession, gene symbol, description, protein length in amino acids, average SAINT score (Prob) and spectral counts (SC) for each PYHIN IP and GFP IP controls.

**Supplementary Table S8. IFI16 Interactions in Human Foreskin Fibroblasts.** For each protein, the following information is provided: UniProt accession, gene symbol, description, protein length in amino acids, average SAINT score (Prob) and spectral counts (SC) for each PYHIN IP and GFP IP controls.

**Supplementary Table S9. Primers for generating GST-tagged IFIX $\alpha$ 1 truncations.** Legend provided with the table below.

**Supplementary Table S10. Oligonucleotide sequences of VACV 70mer and ISD.** Legend provided with the table below.

**Supplementary Table S11. Primers used for detection of HSV-1 genomic DNA.** Legend provided with the table below.

**Supplementary Table S12. IFIX Interactions during HSV-1 Infection.** For each protein, the following information is provided: UniProt accession, gene symbol, description, protein length in amino acids, average SAINT score (Prob) and spectral counts (SC) for each PYHIN IP and GFP IP controls.

| Primer                                                | Sequence                                                   |
|-------------------------------------------------------|------------------------------------------------------------|
| <b>IFI16b-F-<u>XhoI</u></b>                           | 5'- GCCG <u>CTCGAG</u> ATGGGAAAAAATACAAGAACATTG            |
| <b>IFI16b-Stop-R-<u>BamHI</u></b>                     | 5'- GCGC <u>GGATCC</u> TTACGGAAGAAAAAGTCTGGTGAAGTTTC       |
| <b>IFI16b-NoStop-R-<u>BamHI</u></b>                   | 5'- GCGC <u>GGATCC</u> CGGAAGAAAAAGTCTGGTGAAGTTTC          |
| <b>IFIX<math>\alpha</math>1-F-<u>XhoI</u></b>         | 5'- GCGC <u>CTCGAG</u> ATGGCAAATAACTACAAGAAAATTG           |
| <b>IFIX<math>\alpha</math>1-NoStop-R-<u>BamHI</u></b> | 5'- GCGC <u>GGATCC</u> CGAGGAACTGCTGGATGGCGGTT             |
| <b>MNDA-F-<u>XhoI</u></b>                             | 5'- GCCG <u>CTCGAG</u> ATGGTGAATGAATACAAGAAAATTCT          |
| <b>MNDA-Stop-R-<u>BamHI</u></b>                       | 5'- GCGC <u>GGATCC</u> TTACGATTAACATTCATTGGTCCTTCCTT       |
| <b>MNDA-NoStop-<u>BamHI</u></b>                       | 5'- GCGC <u>GGATCC</u> CGATTAACATTCATTGGTCCTTCCTT          |
| <b>AIM2-F-<u>XhoI</u></b>                             | 5'- GCCG <u>CTCGAG</u> ATGGAGAGTAAATACAAGGAGATAC           |
| <b>AIM2-Stop-R-<u>BamHI</u></b>                       | 5'- GCGC <u>GGATCC</u><br>TTACGTGTTTTTTTTTTGGCCTTAATAACCTT |
| <b>AIM2-NoStop-R-<u>BamHI</u></b>                     | 5'- GCGC <u>GGATCC</u> CGTGTGTTTTTTTTTTGGCCTTAATAACCTT     |

**Supplementary Table S1. Primers for N- or C-terminally GFP tagging of *pyhin* genes.** Primers for subcloning *pyhin* genes into pEGFP-C3 or pEGFP-N1 expression vectors to generate N- and C-terminally tagged constructs, respectively (Figure 1).

| Primer                                            | Sequence                                                   |
|---------------------------------------------------|------------------------------------------------------------|
| <b>GFP-F-<u>Bam</u>HI</b>                         | 5'- GCGC <u>GGATCC</u> ATGGTGAGCAAGGGCGAGG                 |
| <b>GFP-Stop-R-<u>Xho</u>I</b>                     | 5'- CCGCCG <u>CTCGAG</u> TTAAGGAACTGCTGGATGGCGG            |
| <b>GFP-F-<u>Hind</u>III</b>                       | 5'- CCCC <u>AAGCTT</u> ATGGTGAGCAAGGGCGAGG                 |
| <b>IFI16b-Stop-R-<u>Sal</u>I</b>                  | 5'- ACGC <u>GTCGAC</u> TTAGAAGAAAAAGTCTGGTG                |
| <b>IFI<math>\alpha</math>1-Stop-R-<u>Xho</u>I</b> | 5'- GCCG <u>CTCGAG</u> TTAAGGAACTGCTGGATGGCGG              |
| <b>MNDA-Stop-R-<u>Bgl</u>II</b>                   | 5'- GCGC <u>AGATCT</u> TTACGATTAACATTCATTGGTCCTTCCTT       |
| <b>AIM2-Stop-R-<u>Bam</u>HI</b>                   | 5'- GCGC <u>GGATCC</u><br>TTACGTGTTTTTTTTTTGGCCTTAATAACCTT |
| <b>IFI16b-F-<u>Kpn</u>I</b>                       | 5'- GCGG <u>GGTACC</u> ATGGGAAAAAATACAAGAACATT             |

**Supplementary Table S2. Primers for generating inducible HEK293 cell lines.**  
Primers for subcloning GFP and N- and C-terminally GFP-tagged pyhin genes into pcDNA5/FRT/TO for generating inducible HEK293 cell lines (Figure 1B) are shown.



| Primer                 | Sequence                       | Figure       |
|------------------------|--------------------------------|--------------|
| qPCR-GAPDH-F           | 5' - CGACAGTCAGCCGCATCTTCTTT   | S1A, S1B, 6E |
| qPCR-GAPDH-R           | 5' - GGCAACAATATCCACTTTACCAGAG | S1A, S1B, 6E |
| qPCR-IFI16-F           | 5' - GCTTGAAGACCTGGCTGAAA      | S1A, S1B     |
| qPCR-IFI16-R           | 5' - GAGGGTGCAGGTGAAGTAGC      | S1A, S1B     |
| qPCR-IFIX-F            | 5' - GCAACCGTCTCACAGCTAAA      | S1A, S1B, 5E |
| qPCR-IFIX-R            | 5' - CGAGTCTGCTCTTTGGACATC     | S1A, S1B, 5E |
| qPCR-MNDA-F            | 5' - CCACTACCCAGACCTCATC       | S1A, S1B     |
| qPCR-MNDA-R            | 5' - TGGGGAACATTTCTTCTTGC      | S1A, S1B     |
| qPCR-AIM2-F            | 5' - TTTGGCAAACGTCTTCAGG       | S1A, S1B     |
| qPCR-AIM2-R            | 5' - TGCAGCAGGACTCATTCAG       | S1A, S1B     |
| qPCR- $\beta$ -actin-F | 5' - TCCTCCTGAGCGCAAGTACTC     | 5E           |
| qPCR- $\beta$ -actin-R | 5' - CGGACTCGTCATACTCCTGCT     | 5E           |
| qPCR-IFN- $\beta$ -F   | 5' - GAAGCCTTTGCTCTGGCACAA     | 6E           |
| qPCR-IFN- $\beta$ -R   | 5' - CCTCCCATTC AATTGCCACA     | 6E           |

**Supplementary Table S3. Primers used for Reverse Transcription-Quantitative PCR.** Primers used in for quantification of mRNA transcript abundances in the indicated RT-qPCR experiments are shown.

| Primer                                                 | Sequence                                         |
|--------------------------------------------------------|--------------------------------------------------|
| <b>GST-IFIX<math>\alpha</math>1-PY-F-BamHI</b>         | 5'- GCGC <u>GGATCC</u> GCAAATAACTACAAGAAAATTG    |
| <b>GST-IFIX<math>\alpha</math>1-PYStop-R-XhoI</b>      | 5'- GCCG <u>CTCGAG</u> TTATTTGACTGGAATGGATTCAATT |
| <b>GST- IFIX<math>\alpha</math>1-HIN200-F-BamHI</b>    | 5'- GCGC <u>GGATCC</u> AACCGTCACGCAACTGCCAG      |
| <b>GST- IFIX<math>\alpha</math>1-HIN200Stop-R-XhoI</b> | 5'- GCCG <u>CTCGAG</u> TTAAGGAACTGCTGGATGGCGG    |

**Supplementary Table S9. Primers for generating GST-tagged IFIX $\alpha$ 1 truncations.** Primers for cloning GST-IFIX-PY (aa 1-99) and GST-IFIX-HIN200 (aa 200-492) to be expressed from pGET4T-1 are shown. Purified recombinant proteins were used for the EMSA assays shown in Figure 6A-B.

| Primer      | Sequence                                                                         |
|-------------|----------------------------------------------------------------------------------|
| ISD-F       | 5' - TACAGATCTACTAGTGATCTATGACTGATCTGTACATGATCTACA                               |
| ISD-R       | 5' - TGTAGATCATGTACAGATCAGTCATAGATCACTAGTAGATCTGTA                               |
| VACV70mer-F | 5' - CCATCAGAAAGAGGGTTTAATATTTTTGTGAGACCATCGAAGAGAGAAAG<br>AGATAAAACTTTTTTACGACT |
| VACV70mer-R | 5' - AGTCGTAAAAAAGTTTTATCTCTTTCTCTCTTCGATGGTCTCACAAAATA<br>TTAAACCTCTTTCTGATGG   |

**Supplementary Table S10. Oligonucleotide sequences of VACV 70mer and ISD.** The above oligonucleotide pairs were annealed and used for various experiments. ISD was used for the EMSA assays shown in Figure 6A-B. VACV 70mer was used in cell assays shown in Figure 6D-E.

| Primer       | Sequence                 |
|--------------|--------------------------|
| HSV-1-RL2-F  | 5'- CTGTCGCCTTACGTGAACAA |
| HSV-1-RL2-R  | 5'- CATCCAGAGGCTGTTCCACT |
| HSV-1-UL30-F | 5'- AGCGAATTCGAGATGCTGTT |
| HSV-1-UL30-R | 5'- CCTTTATCTTGCTGCGCTTC |
| HSV-1-US6-F  | 5'- AGCAGGGGTTAGGGAGTTGT |
| HSV-1-US6-R  | 5'- GCATCCACCAAGGCATATT  |

**Supplementary Table S11. Primers used for detection of HSV-1 genomic DNA.**

Primers used to detect the presence of HSV-1 genomic DNA following chromatin immunopurification of GFP or GFP-IFIX (Figure 6F) are shown.
